# Supplementary material for: A localized plant species-specific BVOC emission rate library of China established using a developed statistical approach based on field measurements
Source: Copernicus journal article supplement (doi:10.5194/acp-26-1587-2026), 2026-01-30
Supplement: Supplementary file 1 [file acp-26-1587-2026-supplement.pdf]

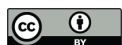

*Supplement of*

## **A localized plant species-specific BVOC emission rate library of China established using a developed statistical approach based on field measurements**

**Huijuan Han et al.**

*Correspondence to:* Lingyu Li (lilingyu@qdu.edu.cn)

The copyright of individual parts of the supplement might differ from the article licence.

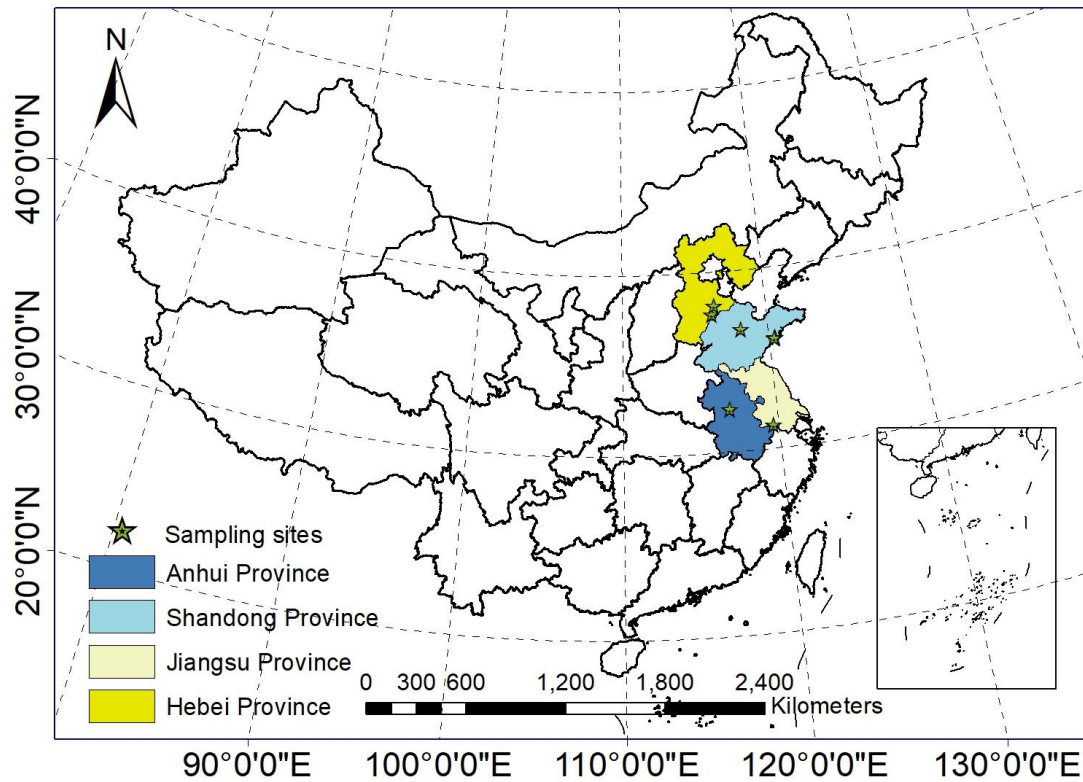

**Figure S1.** Location of observation sites. (Observation sites covered the south and north of China, including Shandong, Hebei, Jiangsu, and Anhui provinces. Their specific locations were shown as the five-pointed stars)

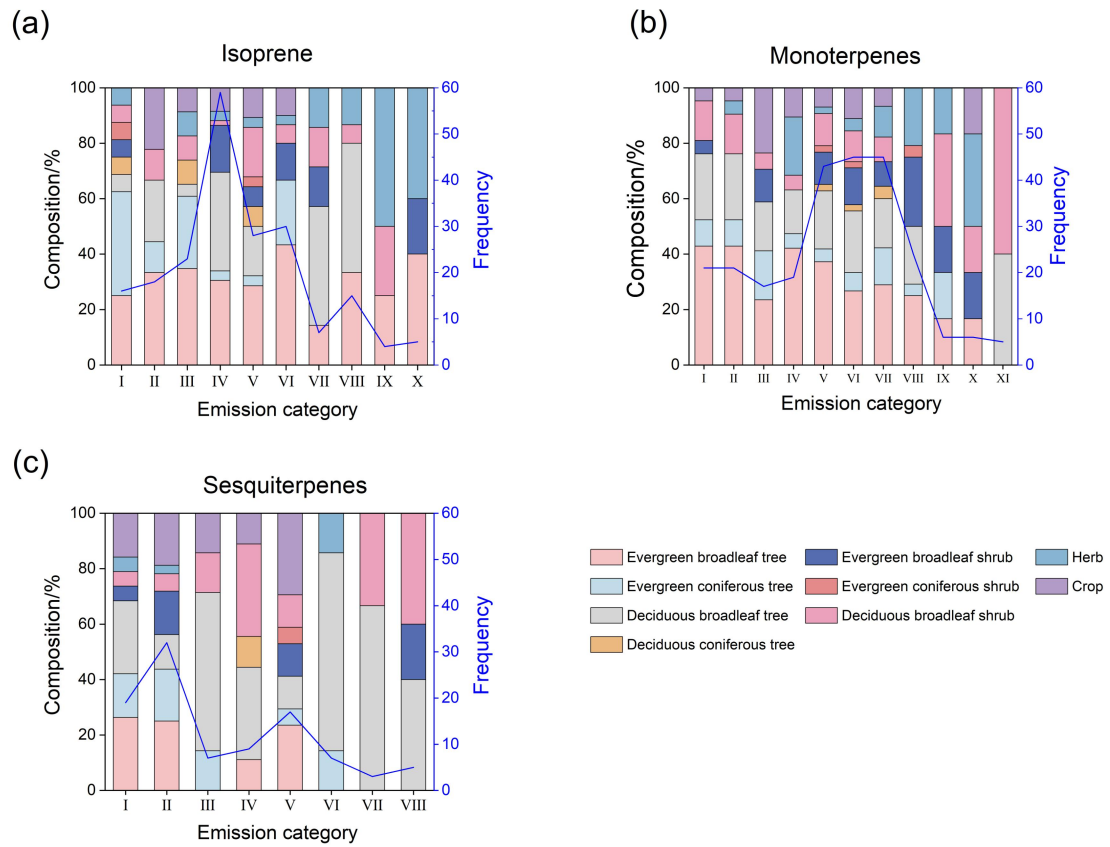

19

20 **Figure S2.** Composition of vegetation types and frequency statistics of plant species within each

21 emission category of isoprene (a), monoterpenes (b), and sesquiterpenes (c).

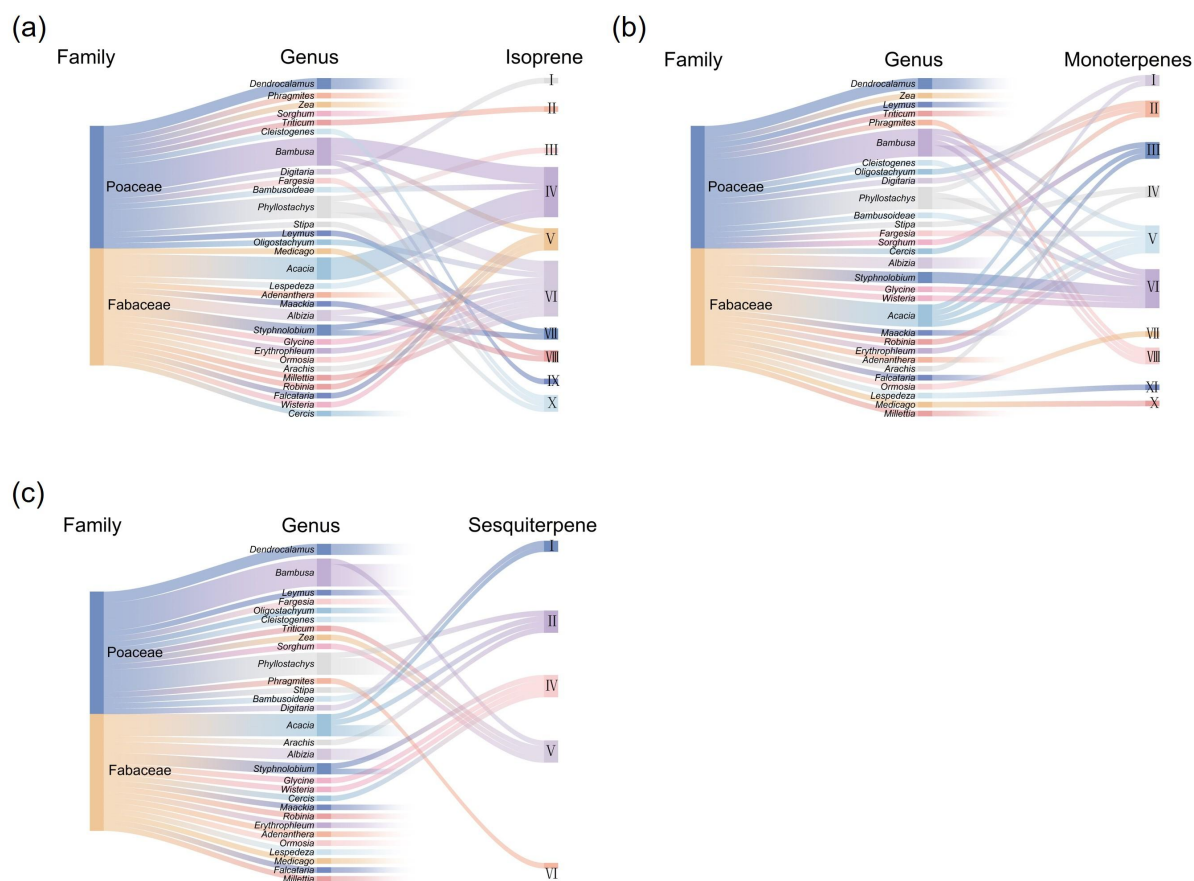

**Figure S3.** Emission categories of the plant species in different genus of families Poaceae and Fabaceae for isoprene (a), monoterpenes (b), and sesquiterpenes (c).

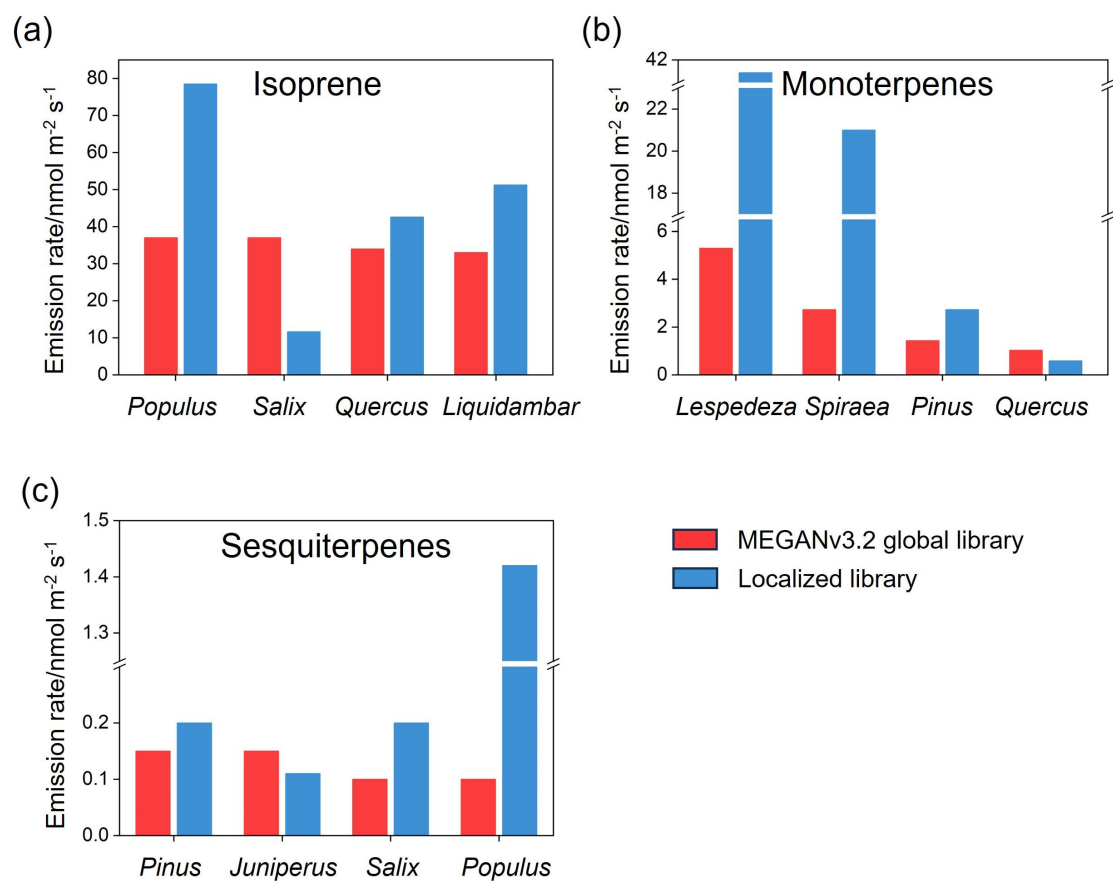

**Figure S4.** Comparison of emission rates at the genus level between the MEGANv3.2 global library and the localized library developed in this study.

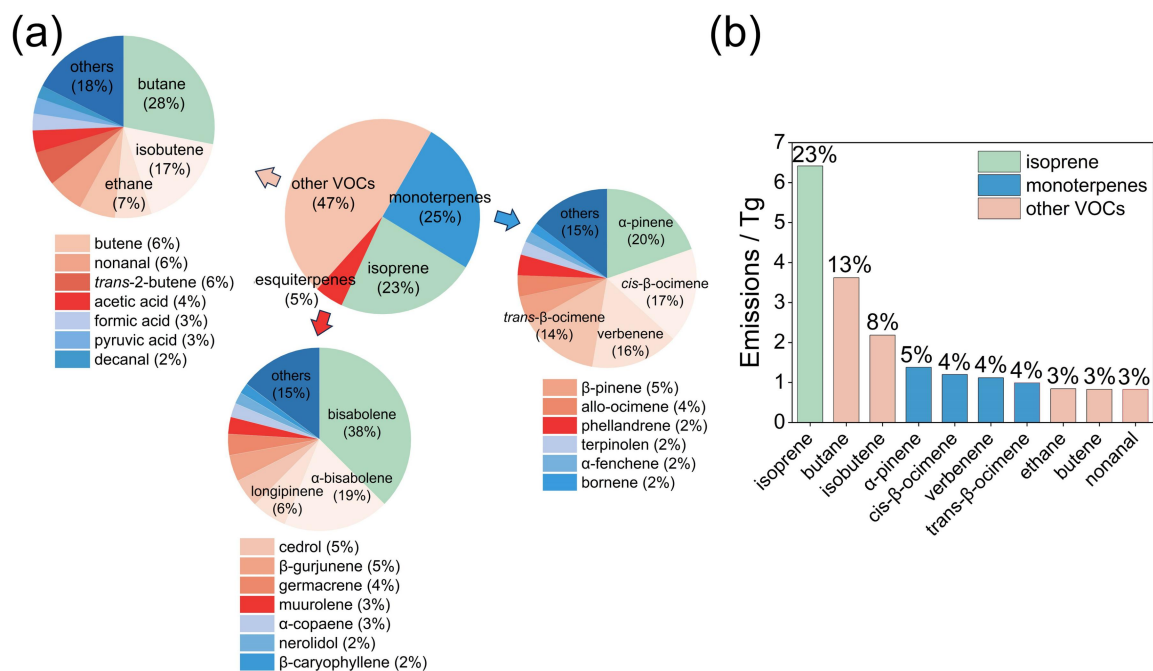

**Figure S5.** BVOC emission composition and top 10 compounds contributing the most to total emissions. (BVOC emission composition of four categories (isoprene, monoterpenes, sesquiterpenes, and other VOCs), and the top ten compounds of monoterpene, sesquiterpene, and other VOC categories (a); top 10 compounds and their belonging category contributing the most to total emissions(b). All percentages are derived from emissions expressed in Tg compound.)

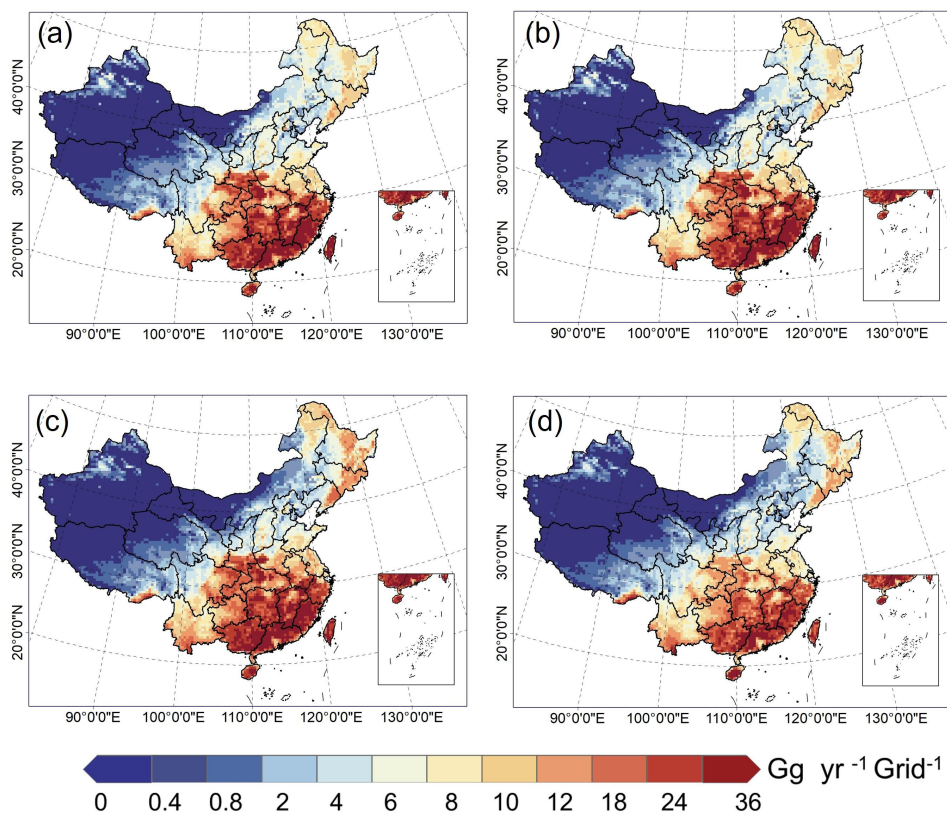

**Figure S6.** Spatial distribution of BVOC emissions in China estimated in various simulations. (a–d: Simulation 1 (a), Simulation 2 (b), Simulation 3 (c), and Simulation 4 (d).)

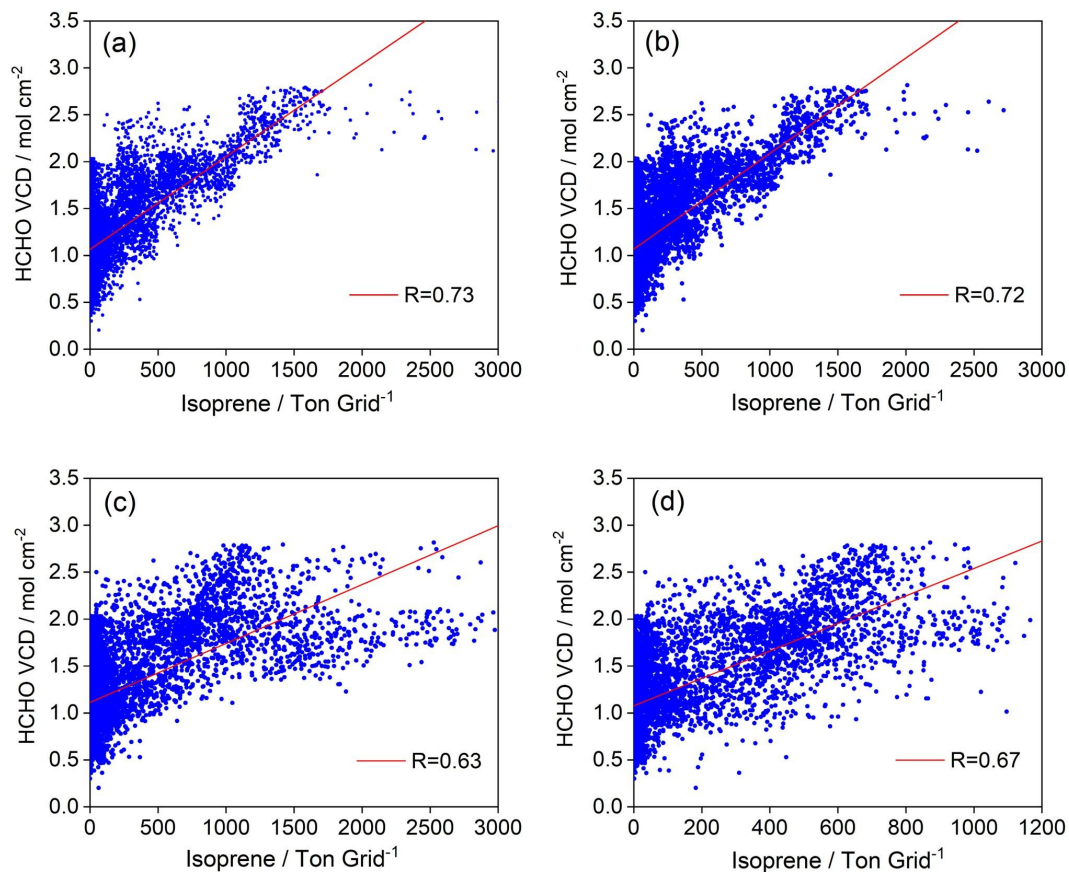

**Figure S7.** The correlation between isoprene emission and observed formaldehyde (HCHO) vertical column density (VCD) in July 2020 during various simulations. (a–d: Simulation 1 (a), Simulation 2 (b), Simulation 3 (c), and Simulation 4 (d).)



41 **Table S1.** Observed plants and environmental conditions.

| Plant species                  | Vegetation type | Sampling date | Temperature/°C | Photosynthetically active<br>radiation/ $\mu\text{mol m}^{-2} \text{s}^{-1}$ | Location*                       |
|--------------------------------|-----------------|---------------|----------------|------------------------------------------------------------------------------|---------------------------------|
| <i>Acer pictum</i>             | broadleaf tree  | 2021.9.13     | 26.8           | 422                                                                          | Qingdao City, Shandong Province |
| <i>Amygdalus persica</i>       | broadleaf tree  | 2022.9.6      | 37.1           | 1048                                                                         | Hengshui City, Hebei Province   |
| <i>Broussonetia papyrifera</i> | broadleaf tree  | 2022.7.25     | 32.6           | 1175                                                                         | Qingdao City, Shandong Province |
| <i>Camphora officinarum</i>    | broadleaf tree  | 2023.5.13     | 29.8           | 9128                                                                         | Yixing City, Jiangsu Province   |
| <i>Celtis sinensis</i>         | broadleaf tree  | 2022.7.21     | 30.4           | 1229                                                                         | Qingdao City, Shandong Province |
| <i>Cerasus serrulata</i>       | broadleaf tree  | 2020.7.29     | 28             | 793                                                                          | Qingdao City, Shandong Province |
| <i>Eucommia ulmoides</i>       | broadleaf tree  | 2022.9.8      | 35.5           | 1053                                                                         | Hengshui City, Hebei Province   |
| <i>Firmiana platanifolia</i>   | broadleaf tree  | 2020.10.9     | 36.7           | 1372                                                                         | Qingdao City, Shandong Province |
| <i>Fraxinus chinensis</i>      | broadleaf tree  | 2022.7.25     | 29.8           | 546                                                                          | Qingdao City, Shandong Province |
| <i>Ilex chinensis</i>          | broadleaf tree  | 2023.3.17     | 33.3           | 1060                                                                         | —                               |
| <i>Koelreuteria bipinnata</i>  | broadleaf tree  | 2020.7.28     | 33.8           | 1004                                                                         | Qingdao City, Shandong Province |
| <i>Koelreuteria bipinnata</i>  | broadleaf tree  | 2023.9.3      | 32.9           | 858                                                                          | Huaian City, Jiangsu Province   |
| <i>Ligustrum sinense</i>       | broadleaf tree  | 2023.5.10     | 25.9           | 780                                                                          | Yixing City, Jiangsu Province   |
| <i>Magnolia grandiflora</i>    | broadleaf tree  | 2020.10.6     | 22.9           | 785                                                                          | Qingdao City, Shandong Province |

|                                  |                 |                 |      |      |                                 |
|----------------------------------|-----------------|-----------------|------|------|---------------------------------|
| <i>Morus alba</i>                | broadleaf tree  | 2022.9.12       | 32.1 | 1027 | Qingdao City, Shandong Province |
| <i>Paulownia tomentosa</i>       | broadleaf tree  | 2022.9.12       | 32.2 | 1063 | Qingdao City, Shandong Province |
| <i>Phoebe zhennan</i>            | broadleaf tree  | 2021.12.30      | 25.7 | 800  | —                               |
| <i>Phyllostachys heterocycla</i> | broadleaf tree  | 2022.7.24       | 36.6 | 556  | Qingdao City, Shandong Province |
| <i>Platanus acerifolia</i>       | broadleaf tree  | 2022.9.2        | 29   | 371  | Hengshui City, Hebei Province   |
| <i>Populus davidiana</i>         | broadleaf tree  | 2022.9.5        | 32.9 | 1063 | Hengshui City, Hebei Province   |
| <i>Populus simonii</i>           | broadleaf tree  | 2022.9.5        | 32.9 | 1063 | Hengshui City, Hebei Province   |
| <i>Prunus cerasifera</i>         | broadleaf tree  | 2022.7.18       | 35.1 | 1086 | Qingdao City, Shandong Province |
| <i>Quercus wutaishansea</i>      | broadleaf tree  | 2022.7.22       | 28.4 | 649  | Qingdao City, Shandong Province |
| <i>Robinia pseudoacacia</i>      | broadleaf tree  | 2021.9.14       | 29.7 | 411  | Qingdao City, Shandong Province |
| <i>Salix babylonica</i>          | broadleaf tree  | 2022.6.2/3      | 37.8 | 961  | Zibo City, Shandong Province    |
| <i>Sophora japonica</i>          | broadleaf tree  | 2021.9.24/30    | 32.3 | 1158 | Qingdao City, Shandong Province |
| <i>Styphnolobium japonicum</i>   | broadleaf tree  | 2022.5.18/22/26 | 30.5 | 1109 | Qingdao City, Shandong Province |
| <i>Trachycarpus fortunei</i>     | broadleaf tree  | 2023.8.30       | 27.9 | 855  | Huaian City, Jiangsu Province   |
| <i>Triadica sebifera</i>         | broadleaf tree  | 2023.9.2        | 31.2 | 887  | Huaian City, Jiangsu Province   |
| <i>Ulmus pumila</i>              | broadleaf tree  | 2022.5.31       | 34.7 | 1057 | Zibo City, Shandong Province    |
| <i>Cedrus deodara</i>            | coniferous tree | 2020.10.15      | 26.3 | 921  | —                               |

|                                     |                 |                     |      |      |                                 |
|-------------------------------------|-----------------|---------------------|------|------|---------------------------------|
| <i>Ginkgo biloba</i>                | coniferous tree | 2022.7.17           | 27   | 900  | —                               |
| <i>Juniperus chinensis</i>          | coniferous tree | 2022.8.28           | 25.2 | 1000 | —                               |
| <i>Metasequoia glyptostroboides</i> | coniferous tree | 2022.7.19           | 27.6 | 1000 | —                               |
| <i>Platycladus orientalis</i>       | coniferous tree | 2021.11.28          | 29   | 900  | —                               |
| <i>Pinus armandi</i>                | coniferous tree | 2022.9.4/5          | 33.0 | 1010 | —                               |
| <i>Pinus densiflora</i>             | coniferous tree | 2023.3.2            | 28.5 | 1104 | —                               |
| <i>Pinus massoniana</i>             | coniferous tree | 2021.4.7/9          | 25.1 | 931  | —                               |
| <i>Pinus parviflora</i>             | coniferous tree | 2023.5.14           | 32.3 | 1322 | Yixing City, Jiangsu Province   |
| <i>Pinus tabulaeformis</i>          | coniferous tree | 2020.11.5           | 30.8 | 1376 | —                               |
| <i>Pinus thunbergii</i>             | coniferous tree | 2022.9.28           | 31.6 | 900  | —                               |
| <i>Sabina chinensis</i>             | coniferous tree | 2021.10.16/17       | 26   | 995  | —                               |
| <i>Berberis thunbergii</i>          | broadleaf shrub | 2022.9.6            | 32.7 | 984  | Hengshui City, Hebei Province   |
| <i>Buxus megistophylla</i>          | broadleaf shrub | 2021.6.23/24/<br>28 | 29.1 | 1000 | —                               |
| <i>Buxus sinica</i>                 | broadleaf shrub | 2022.9.4            | 35.9 | 780  | Hengshui City, Hebei Province   |
| <i>Cercis chinensis</i>             | broadleaf shrub | 2020.7.30           | 34.4 | 951  | Qingdao City, Shandong Province |
| <i>Clerodendrum bungei</i>          | broadleaf shrub | 2023.9.1            | 30.4 | 1072 | Huaian City, Jiangsu Province   |

|                                                   |                  |                |      |      |                                 |
|---------------------------------------------------|------------------|----------------|------|------|---------------------------------|
| <i>Forsythia suspensa</i>                         | broadleaf shrub  | 2021.7.3       | 28.8 | 1000 | —                               |
| <i>Forsythia viridissima</i>                      | broadleaf shrub  | 2023.5.16      | 32.3 | 889  | Yixing City, Jiangsu Province   |
| <i>Hibiscus syriacus</i>                          | broadleaf shrub  | 2022.4.21/22   | 24.8 | 900  | —                               |
| <i>Lagerstroemia indica</i>                       | broadleaf shrub  | 2022.5.20/24   | 30.5 | 1280 | Qingdao City, Shandong Province |
| <i>Ligustrum lucidum</i>                          | broadleaf shrub  | 2021.7.2       | 29.2 | 1167 | —                               |
| <i>Lonicera japonica</i>                          | broadleaf shrub  | 2022.9.3       | 26   | 389  | Hengshui City, Hebei Province   |
| <i>Loropetalum chinense</i> var.<br><i>rubrum</i> | broadleaf shrub  | 2023.5.12      | 31.4 | 1084 | Yixing City, Jiangsu Province   |
| <i>Malus spectabilis</i>                          | broadleaf shrub  | 2022.8.4       | 32.6 | 360  | Qingdao City, Shandong Province |
| <i>Nerium oleander</i>                            | broadleaf shrub  | 2023.5.15      | 31.3 | 1101 | Yixing City, Jiangsu Province   |
| <i>Osmanthus fragrans</i>                         | broadleaf shrub  | 2021.12.29     | 25.9 | 1000 | —                               |
| <i>Photinia serratifolia</i>                      | broadleaf shrub  | 2021.9.9/11/12 | 32   | 1075 | Qingdao City, Shandong Province |
| <i>Pittosporum tobira</i>                         | broadleaf shrub  | 2023.8.31      | 31.0 | 990  | Huaian City, Jiangsu Province   |
| <i>Syringa oblata</i>                             | broadleaf shrub  | 2022.9.7       | 31.6 | 1152 | Hengshui City, Hebei Province   |
| <i>Wisteria sinensis</i>                          | broadleaf shrub  | 2022.5.16/17   | 30.1 | 1159 | Qingdao City, Shandong Province |
| <i>Juniperus chinensis</i> ‘Aurea’                | coniferous shrub | 2022.9.6/7     | 33.8 | 1062 | —                               |
| <i>Acorus calamus</i>                             | herb             | 2022.9.7       | 34.5 | 1065 | Hengshui City, Hebei Province   |

|                             |      |                |      |      |                                 |
|-----------------------------|------|----------------|------|------|---------------------------------|
| <i>Phragmites australis</i> | herb | 2022.5.9/11/12 | 25.8 | 1322 | Qingdao City, Shandong Province |
| <i>Triticum aestivum</i>    | crop | 2023.5.6/7/8   | 30.1 | 1258 | Qingdao City, Shandong Province |
| <i>Zea mays</i>             | crop | 2023.6.9       | 32.9 | 1083 | Qingdao City, Shandong Province |

---

42 \*: “–” represents the pot experiments.

43 **Table S2.** Quantified BVOC compounds in this study.

| Category       | Compounds                                                                                                                                                                                                                                                                                                                                                     |
|----------------|---------------------------------------------------------------------------------------------------------------------------------------------------------------------------------------------------------------------------------------------------------------------------------------------------------------------------------------------------------------|
| Isoprene       | Isoprene                                                                                                                                                                                                                                                                                                                                                      |
| Monoterpenes   | Tricyclene, $\alpha$ - Pinene, Camphene, Sabinene, $\beta$ -Pinene, Myrcene,<br>$\alpha$ -Phellandrene, 3-Carene, $\alpha$ -Terpinene, Limonene, cis- $\beta$ -Ocimene,<br>trans- $\beta$ -Ocimene, $\gamma$ -Terpinene, Terpinolene                                                                                                                          |
| Sesquiterpenes | Isolongifolene, Longifolene, $\alpha$ -Cedrene, $\beta$ -Caryophyllene,<br>Aromadendrene, $\alpha$ -Farnesene                                                                                                                                                                                                                                                 |
| Alkanes        | Cyclopentane, 2,2-Dimethylbutane, 2,3-Dimethylbutane,<br>2,4-Dimethylpentane, 2,3-Dimethylpentane, 3-Methylhexane, n-Heptane,<br>2,3,4-Trimethylpentane, 2-Methylheptane, 3-Methylheptane, n-Octane,<br>Methylcyclopentane, 3-Methylpentane, n-Hexane,<br>2,2,4-Trimethylpentane, n-Nonane, n-Decane, n-Undecane, Dodecane,<br>Methylcyclohexane, Cyclohexane |
| Alkenes        | n-Hexene, n-Pentene, trans-2-Pentene, cis-2-Pentene                                                                                                                                                                                                                                                                                                           |
| Aromatics      | Benzene, Toluene, Ethylbenzene, m-Xylene, p-Xylene, o-Xylene,<br>n-Propylbenzene, Styrene, iso-Propylbenzene, m-Ethyltoluene,<br>p-Ethyltoluene, 1,3,5-Trimethylbenzene, o-Ethyltoluene,<br>1,2,4-Trimethylbenzene, 1,2,3-Trimethylbenzene, m-Diethylbenzene,<br>p-Diethylbenzene                                                                             |

45 **Table S3.** Emission rate intervals and representative values of each emission category.

| Enclosure<br>technique | BVOCs<br>component | Emission<br>category | Emission rate<br>interval ( $\mu\text{g g}^{-1} \text{h}^{-1}$ ) | Representative                                          |           |            |
|------------------------|--------------------|----------------------|------------------------------------------------------------------|---------------------------------------------------------|-----------|------------|
|                        |                    |                      |                                                                  | emission rate<br>( $\mu\text{g g}^{-1} \text{h}^{-1}$ ) | Frequency | Proportion |
| Dynamic                | Isoprene           | I                    | 0.01–0.03                                                        | 0.02                                                    | 18        | 7%         |
|                        |                    | II                   | 0.13–0.30                                                        | 0.20                                                    | 22        | 9%         |
|                        |                    | III                  | 0.87–2.0                                                         | 1.3                                                     | 29        | 12%        |
|                        |                    | IV                   | 2.8–6.3                                                          | 4.2                                                     | 52        | 21%        |
|                        |                    | V                    | 7.0–15.0                                                         | 10.3                                                    | 37        | 15%        |
|                        |                    | VI                   | 19.0–42.8                                                        | 28.5                                                    | 43        | 17%        |
|                        |                    | VII                  | 45.0–75.0                                                        | 59.5                                                    | 14        | 6%         |
|                        |                    | VIII                 | 83.6–188.1                                                       | 125.4                                                   | 20        | 8%         |
|                        |                    | IX                   | 200.0–388.4                                                      | 258.9                                                   | 9         | 4%         |
|                        |                    | X                    | >500.0                                                           | 500.0                                                   | 5         | 2%         |
|                        | Monoterpenes       | I                    | 0.05–0.12                                                        | 0.08                                                    | 26        | 7%         |
|                        |                    | II                   | 0.16–0.30                                                        | 0.24                                                    | 31        | 8%         |
|                        |                    | III                  | 0.31–0.60                                                        | 0.46                                                    | 35        | 9%         |
|                        |                    | IV                   | 0.60–1.0                                                         | 0.82                                                    | 28        | 7%         |
|                        |                    | V                    | 1.0–2.0                                                          | 1.5                                                     | 59        | 15%        |
|                        |                    | VI                   | 2.0–4.0                                                          | 2.9                                                     | 63        | 16%        |
|                        |                    | VII                  | 4.0–8.0                                                          | 5.8                                                     | 68        | 17%        |
|                        |                    | VIII                 | 8.9–20.0                                                         | 13.4                                                    | 44        | 11%        |
|                        |                    | IX                   | 22.5–50.0                                                        | 33.8                                                    | 19        | 5%         |
|                        |                    | X                    | 58.3–131.3                                                       | 87.5                                                    | 12        | 3%         |
|                        | Sesquiterpenes     | XI                   | >200.0                                                           | 200.0                                                   | 5         | 1%         |
|                        |                    | I                    | 0.03–0.08                                                        | 0.05                                                    | 18        | 19%        |
|                        |                    | II                   | 0.11–0.25                                                        | 0.17                                                    | 19        | 20%        |

|        |              |      |            |       |     |      |
|--------|--------------|------|------------|-------|-----|------|
| Static | Isoprene     | III  | 0.25–0.50  | 0.36  | 10  | 11%  |
|        |              | IV   | 0.50–0.90  | 0.68  | 11  | 12%  |
|        |              | V    | 1.0–2.3    | 1.5   | 17  | 18%  |
|        |              | VI   | 3.0–6.5    | 4.3   | 9   | 10%  |
|        |              | VII  | 17.0–38.3  | 25.5  | 6   | 6%   |
|        |              | VIII | >50.0      | 50.0  | 5   | 5%   |
|        |              | I    | 0.15–0.33  | 0.22  | 21  | 5%   |
|        |              | II   | 0.48–1.0   | 0.72  | 40  | 9%   |
|        | Monoterpenes | III  | 1.1–2.5    | 1.7   | 92  | 21%  |
|        |              | IV   | 2.5–4.5    | 3.6   | 94  | 22%  |
|        |              | V    | 4.5–10.0   | 6.7   | 92  | 21%  |
|        |              | VI   | 10.0–15.0  | 12.2  | 36  | 8%   |
|        |              | VII  | 15.0–30.0  | 21.7  | 26  | 6%   |
|        |              | VIII | 36.0–81.1  | 54.0  | 17  | 4%   |
|        |              | IX   | 90.0–160.0 | 116.2 | 8   | 2%   |
|        |              | X    | >160.0     | 160.0 | 3   | 1%   |
|        |              | I    | 0.11–0.25  | 0.17  | 12  | 3%   |
|        |              | II   | 0.31–0.65  | 0.46  | 43  | 10%  |
|        |              | III  | 0.65–1.0   | 0.84  | 38  | 9%   |
|        |              | IV   | 1.0–2.0    | 1.5   | 107 | 26%  |
|        |              | V    | 2.0–3.0    | 2.5   | 60  | 15%  |
|        |              | VI   | 3.0–4.5    | 3.8   | 52  | 13%  |
|        |              | VII  | 4.5–10.0   | 6.8   | 57  | 14%  |
|        |              | VIII | 10.0–21.3  | 14.2  | 38  | 9%   |
|        |              | IX   | 22.0–44.6  | 29.7  | 4   | 1%   |
|        |              | X    | >50.0      | 50.0  | 1   | 0.2% |



47 **Table S4.** Emission rates of each BVOC component of Poaceae plants ( $\mu\text{g g}^{-1} \text{h}^{-1}$ )

| Plant                                       | Genus                   | Isoprene | Monoterpenes | Sesquiterpenes | Vegetation type           |
|---------------------------------------------|-------------------------|----------|--------------|----------------|---------------------------|
| <i>Bambusa vulgaris f. vittata</i>          | <i>Bambusa</i>          | 4.2      | 13.4         | –              | evergreen broadleaf tree  |
| <i>Bambusa vulgaris 'Wamin'</i>             | <i>Bambusa</i>          | 4.2      | –            | –              | evergreen broadleaf tree  |
| <i>Bambusa ventricosa</i>                   | <i>Bambusa</i>          | 4.2      | 1.5          | 1.5            | evergreen broadleaf tree  |
| <i>Bambusa textilis</i>                     | <i>Bambusa</i>          | 500.0    | 2.9          | –              | evergreen broadleaf tree  |
| <i>Bambusa multiplex 'Alphonse-Karr'</i>    | <i>Bambusa</i>          | –        | 5.9          | –              | evergreen broadleaf tree  |
| <i>Bamboo</i>                               | <i>Bambusoideae</i>     | 4.2      | 2.9          | –              | evergreen broadleaf tree  |
| <i>Dendrocalamus latiflorus</i>             | <i>Dendrocalamus</i>    | 19.4     | –            | –              | evergreen broadleaf tree  |
| <i>Dendrocalamus asper</i>                  | <i>Dendrocalamus</i>    | 19.4     | –            | –              | evergreen broadleaf tree  |
| <i>Dendrocalamopsis oldhami</i>             | <i>Dendrocalamopsis</i> | 10.3     | –            | –              | evergreen broadleaf tree  |
| <i>Oligostachyum lubricum</i>               | <i>Oligostachyum</i>    | 28.5     | 0.24         | –              | evergreen broadleaf tree  |
| <i>Phyllostachys makinoi</i>                | <i>Phyllostachys</i>    | 1.3      | –            | –              | evergreen broadleaf tree  |
| <i>Phyllostachys propinqua</i>              | <i>Phyllostachys</i>    | 28.5     | 0.08         | 0.17           | evergreen broadleaf tree  |
| <i>Phyllostachys sulphurea var. viridis</i> | <i>Phyllostachys</i>    | 28.5     | 2.9          | 0.17           | evergreen broadleaf tree  |
| <i>Phyllostachys edulis</i>                 | <i>Phyllostachys</i>    | 77.0     | –            | –              | evergreen broadleaf tree  |
| <i>Fargesia spathacea</i>                   | <i>Fargesia</i>         | 500.0    | 1.5          | 1.5            | evergreen broadleaf shrub |

|                                 |                     |       |      |      |      |
|---------------------------------|---------------------|-------|------|------|------|
| <i>Cleistogenes squarrosa</i>   | <i>Cleistogenes</i> | 258.9 | 13.4 | —    | herb |
| <i>Digitaria sanguinalis</i>    | <i>Digitaria</i>    | 0.02  | 0.24 | 0.05 | herb |
| <i>Leymus chinensis</i>         | <i>Leymus</i>       | 59.5  | 45.2 | —    | herb |
| <i>Phragmites australis</i>     | <i>Phragmites</i>   | 16.4  | 13.4 | 4.3  | herb |
| <i>Stipa grandis</i>            | <i>Stipa</i>        | —     | 0.82 | —    | herb |
| <i>Stipa baicalensis</i>        | <i>Stipa</i>        | 125.4 | 0.82 | —    | herb |
| <i>weed</i>                     | —                   | 258.9 | 87.5 | —    | herb |
| <i>Oryza sativa</i>             | <i>Oryza</i>        | —     | 5.8  | 1.5  | crop |
| <i>Sorghum bicolor</i> 'Dochna' | <i>Sorghum</i>      | 16.4  | 0.46 | 1.5  | crop |
| <i>Triticum aestivum</i>        | <i>Triticum</i>     | 0.20  | 2.2  | 1.5  | crop |
| <i>Zea mays</i>                 | <i>Zea</i>          | 16.4  | 0.35 | 1.5  | crop |

---
